# Supplementary material for: Electrodeposition of Cu nanowires with ultrahigh-density twin boundaries: an electrochemical perspective on nanotwinning
Source: Royal Society of Chemistry journal article supplement (doi:10.1039/d4nr03537b), 2024-12-05
Supplement: d4nr03537b1.pdf [file d4nr03537b1.pdf]

**SUPPLEMENTARY INFORMATION**

**Electrodeposition of Cu nanowires with ultrahigh-density twin  
boundaries: An electrochemical perspective on nanotwinning**

Hao-Che Huang<sup>a</sup>, Hsin-Yu Chen<sup>a</sup>, and Chien-Neng Liao<sup>a,b\*</sup>

<sup>a</sup> Department of Materials Science and Engineering, National Tsing Hua University, Hsinchu 300044, Taiwan.

<sup>b</sup> College of Semiconductor Research, National Tsing Hua University, Hsinchu 300044, Taiwan.

\*To whom correspondence should be addressed. Email: [cnliao@mx.nthu.edu.tw](mailto:cnliao@mx.nthu.edu.tw)

## **Supplementary Table**

**Table S1:** The electrolytes and electrochemical anodization conditions employed in making the porous AAO templates with different pore diameters.

| Pore size | Electrolyte                                       | Anodic voltage | 1 <sup>st</sup> pore widening | 2 <sup>nd</sup> pore widening |
|-----------|---------------------------------------------------|----------------|-------------------------------|-------------------------------|
| 35 nm     | 0.3M H <sub>2</sub> SO <sub>4</sub>               | 24 V           | 23°C / 15 min                 | 23°C / 37 min                 |
| 70 nm     | 0.3M H <sub>2</sub> C <sub>2</sub> O <sub>4</sub> | 40 V           | 23°C / 30 min                 | 30°C / 55 min                 |
| 90 nm     | 0.3M H <sub>2</sub> C <sub>2</sub> O <sub>4</sub> | 40 V           | 23°C/ 30 min                  | 30°C / 71 min                 |

## Supplementary Figures

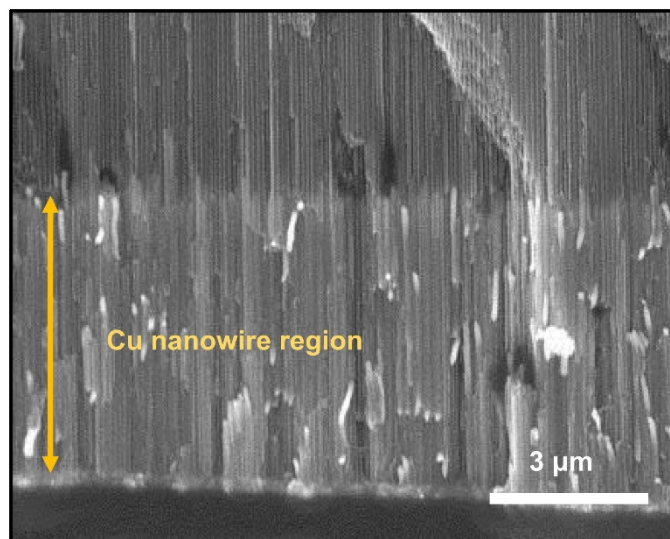

**Figure S1.** Cross-sectional SEM image of the AAO template with electrodeposited nt-Cu nanowires.

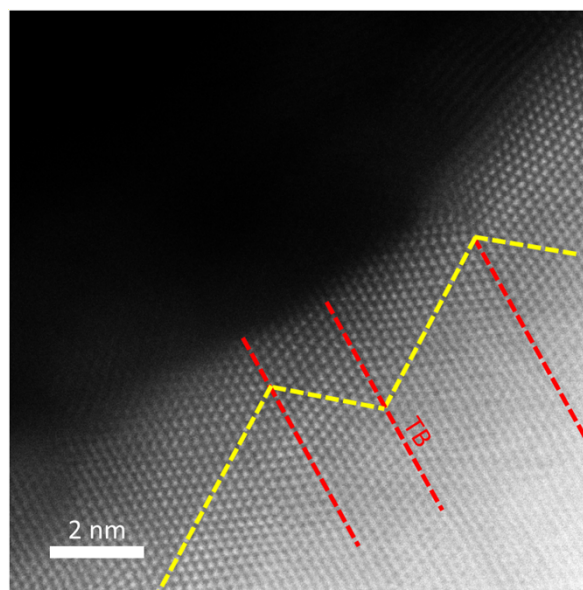

**Figure S2.** Dark-field scanning transmission electron microscopy (DF-STEM) micrograph revealing the atomic-resolution image of the twin structure in the nt-Cu nanowire.

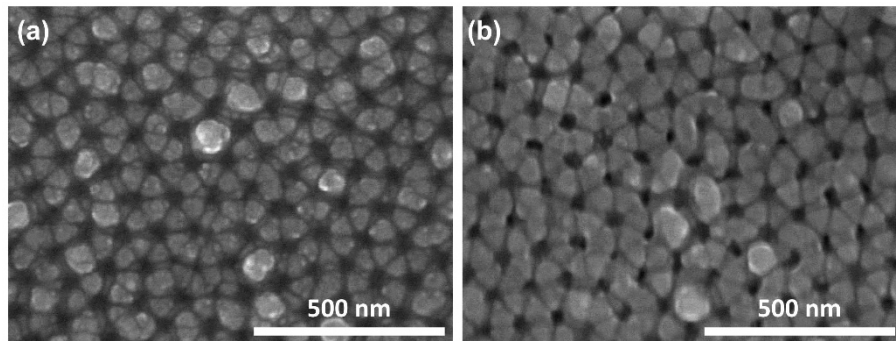

**Figure S3.** Planar SEM image of the Cu seed deposited on the porous AAO template before and after annealing at 250 °C for 1 hour.

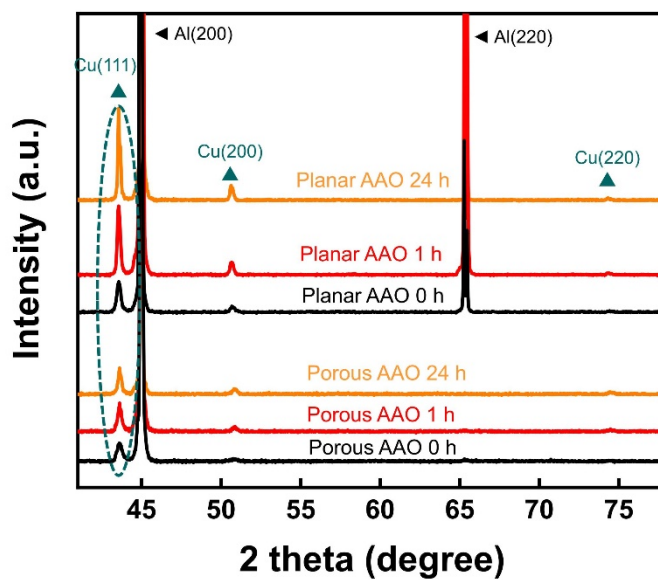

**Figure S4.** XRD patterns of the Cu seeds deposited on the porous and planar AAO after annealing at 250 °C for 0, 1, and 24 hours.

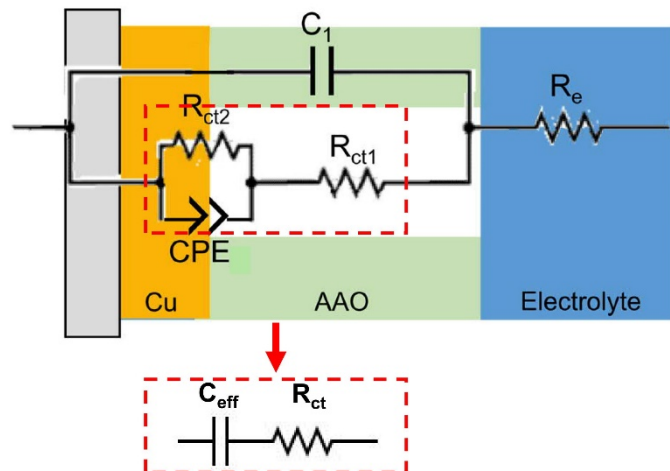

**Figure S5.** The equivalent circuit model for the porous AAO-templated electrode in an electrochemical cell.
